# Supplementary material for: Highly uniform TiO2/SnO2/carbon hybrid nanofibers with greatly enhanced lithium storage performance
Source: Royal Society of Chemistry journal article supplement (doi:10.1039/c3ta11751k), 2013-01-01
Supplement: c3ta11751k.pdf [file c3ta11751k.pdf]

# Highly Uniform TiO<sub>2</sub>/SnO<sub>2</sub>/Carbon Hybrid Nanofibers with Greatly Enhanced Lithium Storage Performance

Zunxian Yang,<sup>\*1</sup> Qing Meng,<sup>2</sup> Zaiping Guo,<sup>\*2,3</sup> Xuebin Yu,<sup>\*4</sup> Tailiang Guo,<sup>1</sup>  
Rong Zeng<sup>5</sup>

<sup>1</sup> National & Local United Engineering Laboratory of Flat Panel Display Technology, Fuzhou University, Fuzhou 350002, P. R. China

<sup>2</sup>Institute for Superconducting & Electronic Materials, University of Wollongong, NSW 2522, Australia

<sup>3</sup>School of Mechanical, Materials & Mechatronics Engineering, University of Wollongong, NSW 2522, Australia

<sup>4</sup>Department of Materials Science, Fudan University, Shanghai 200433, P. R. China

<sup>5</sup>School of Computing, Engineering and Mathematics, University of Western Sydney, NSW 2751, Australia,

## Supporting Information

### Captions

**Fig. S1** TGA results for (a) TSC1, (b) TSC2, (c) TSC3.

**Fig. S2** Low and high (insets) magnification FE-SEM images of the hybrid nanofibers: (a) TSC1; (b) TS1; (c) TSC2; (d) TS2; (e) TSC3; (f) TS3. (The hybrid nanofibers of

---

\* Corresponding author should be addressed. Tel.: +61 2 4221 5225; Fax: +61 2 4221 5731

E-mail: [zguo@uow.edu.au](mailto:zguo@uow.edu.au) (Z. Guo)

[yangzunxian@hotmail.com](mailto:yangzunxian@hotmail.com) (Z. Yang)

[yuxuebin@fudan.edu.cn](mailto:yuxuebin@fudan.edu.cn) (X. Yu)

**TSC1**, **TSC2**, and **TSC3** are smoother and slightly thicker than those of **TS1**, **TS2**, and **TS3** because the carbon matrix has been removed from the **TS1**, **TS2**, and **TS3** nanofibers.)

**Fig. S3 (a)** Low-magnification TEM image of **TS1**, indicating that there are some short broken nanofibers, possibly owing to the ultrasonic dispersion process during the sample preparation for TEM observations. **(b)** High-magnification TEM image of **TS1**, indicating that there are many rutile TiO<sub>2</sub> nanocrystals in the hybrid nanofibers.

**Fig. S4** Energy dispersive X-ray (EDX) spectra and corresponding content tables for the samples (**insets**): **(a)** **TSC1**; **(b)** **TS1**; **(c)** **TSC2**; **(d)** **TS2**; **(e)** **TSC3**; **(f)** **TS3**. (Carbon signals in the samples lacking it result from the tape used for SEM observations.)

**Fig. S5** XPS high-resolution spectra with curve fitting of **(a)** Ti2p region of **TSC3**, **(b)** Ti2p region of **TS3**, **(c)** Sn3d region of **TSC3**, **(d)** Sn3d region of **TS3**, **(e)** O1s region of **TSC3**, **(f)** O1s region of **TS3**, **(g)** C1s region of **TSC3**.

**Fig. S6** Cyclic voltammograms of **TS2** electrode from the first cycle to the fifth cycle at a scan rate of 0.1 mVs<sup>-1</sup> in the voltage range of 0.01–3.0 V.

**Fig. S7** Comparison of cycling performance **(a)** and coulombic efficiency **(b)** of **TSC3** nanofiber electrodes with that of SnO<sub>2</sub>/C nanofiber electrodes fabricated using the same technique.

**Fig. S8** Nyquist plots of **TS1** and **TSC1** electrodes. The inset shows equivalent circuits for the **TS1** and **TSC1** electrode/electrolyte interfaces.

**Table S1** Kinetic parameters of **TS1** and **TSC1** electrodes.

**Fig.S9** Charge diffusion and conduction mechanisms of composite nanowires during charge/discharge processes, with the insets showing typical nanofibers:

**(a)** **TSC1**, **TSC2**, and **TSC3**; **(b)** **TS1**, **TS2**, and **TS3**.

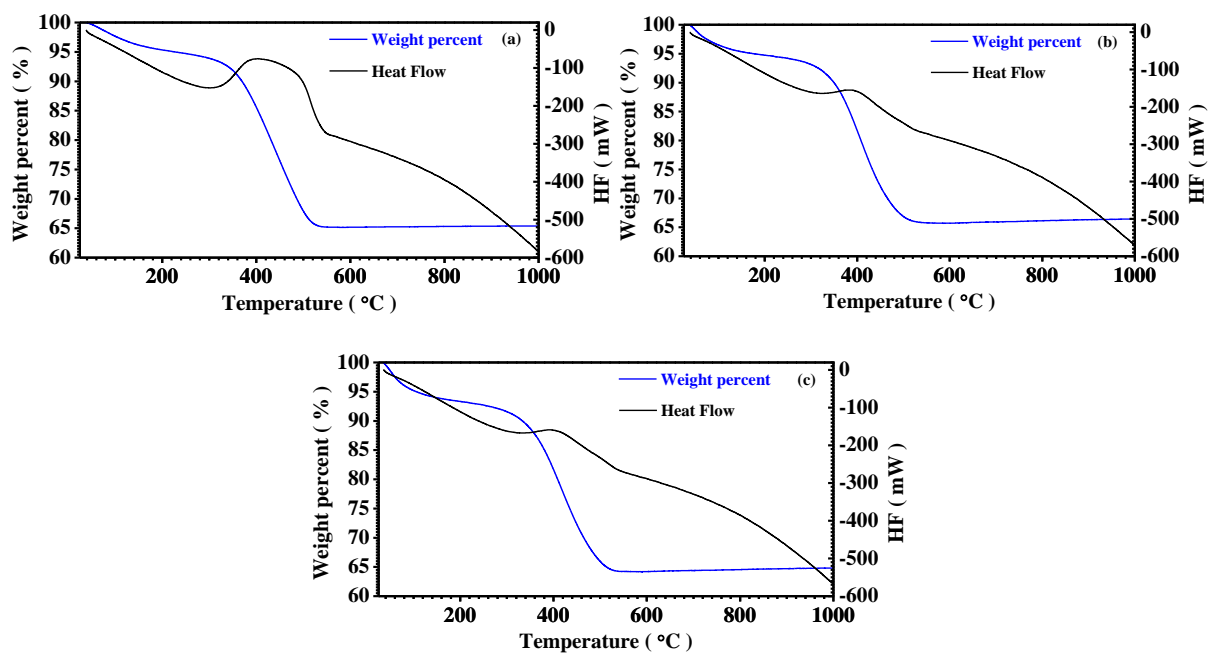

**Fig. S1**

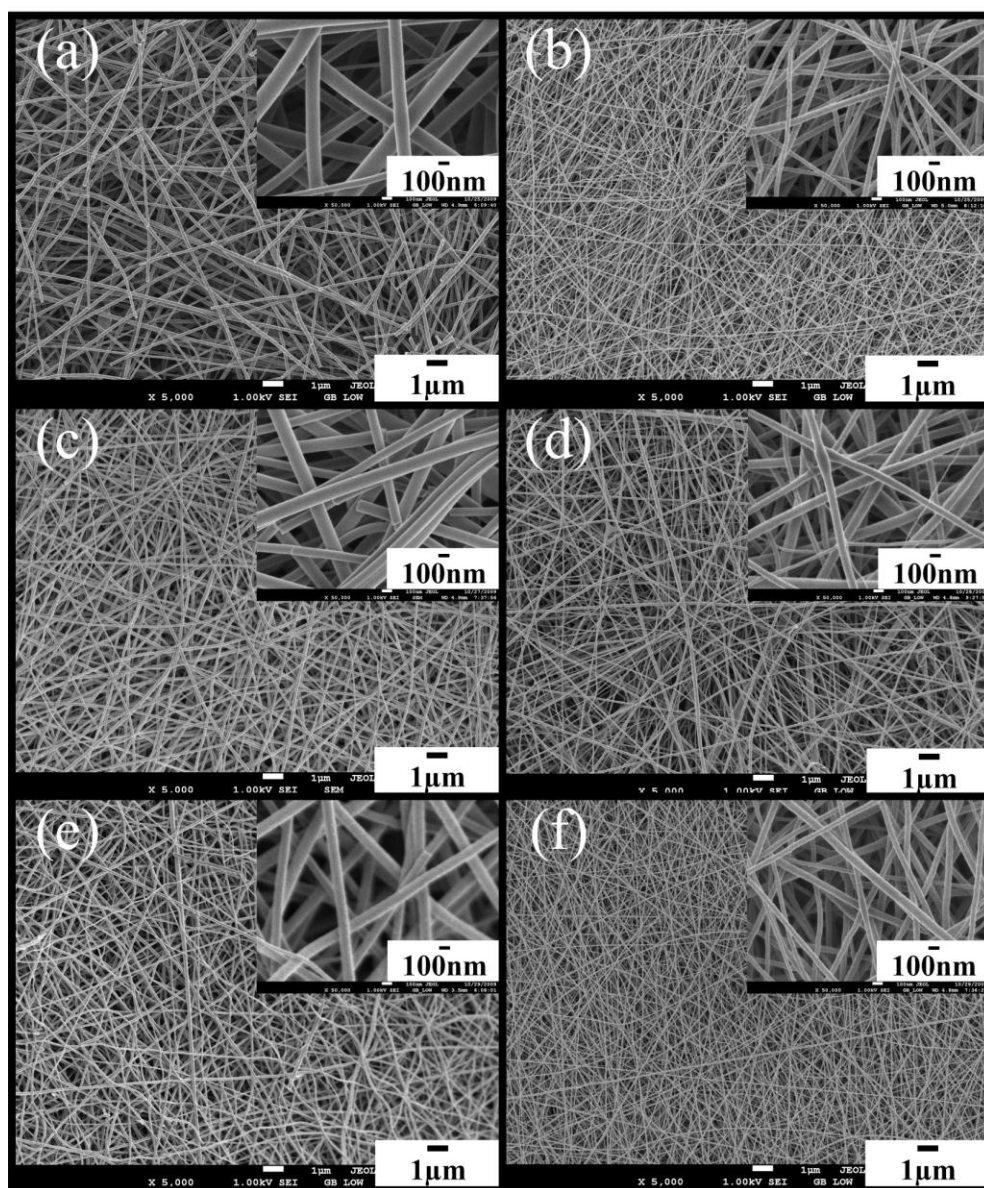

Fig. S2

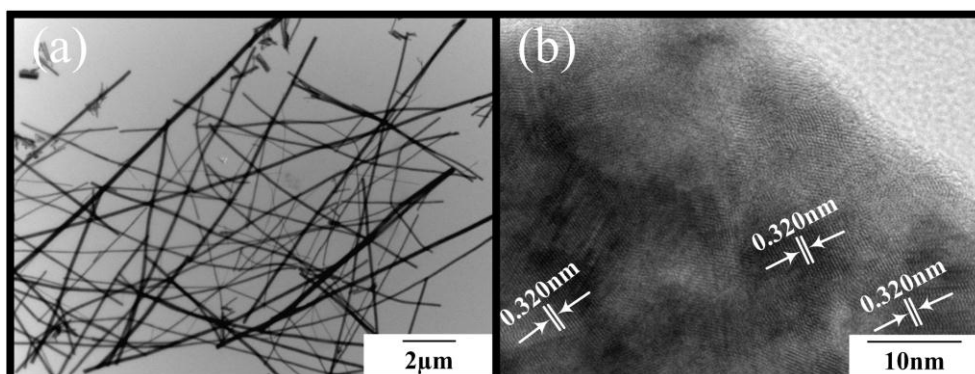

**Fig. S3**

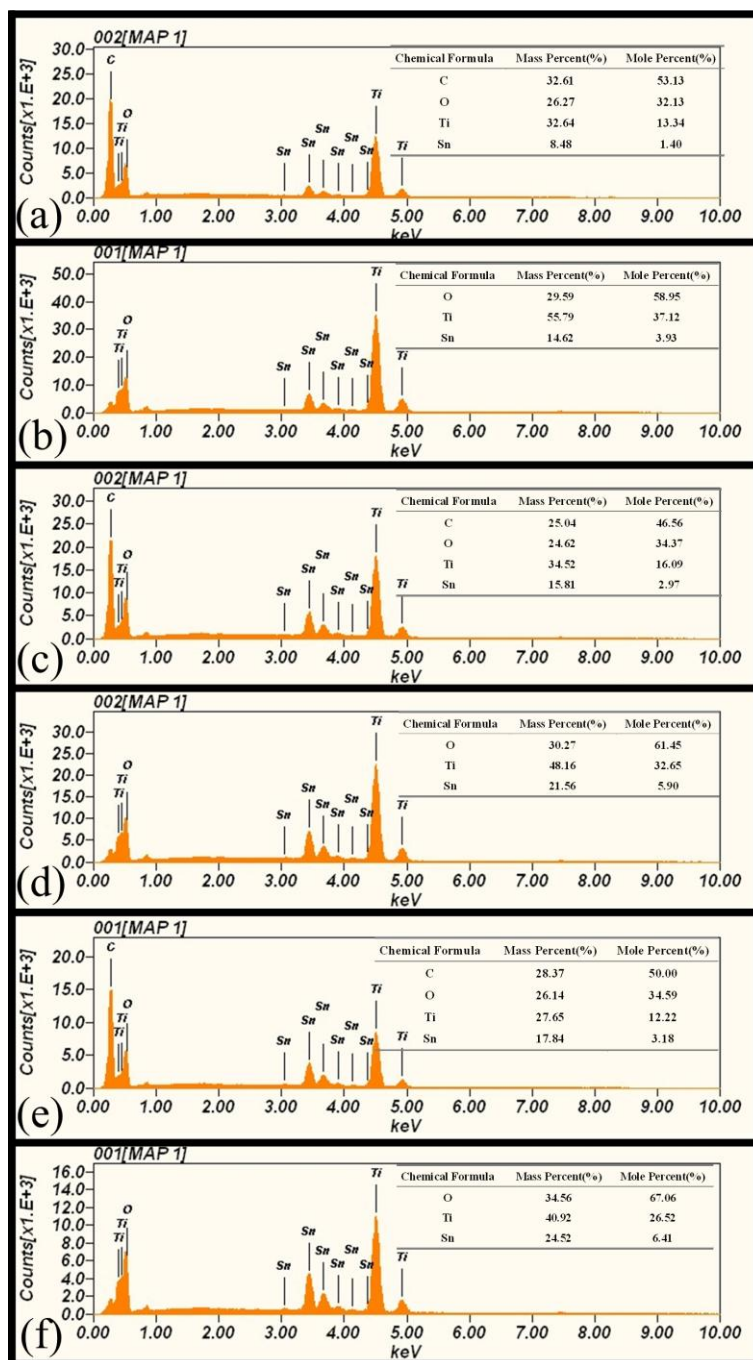

Fig. S4

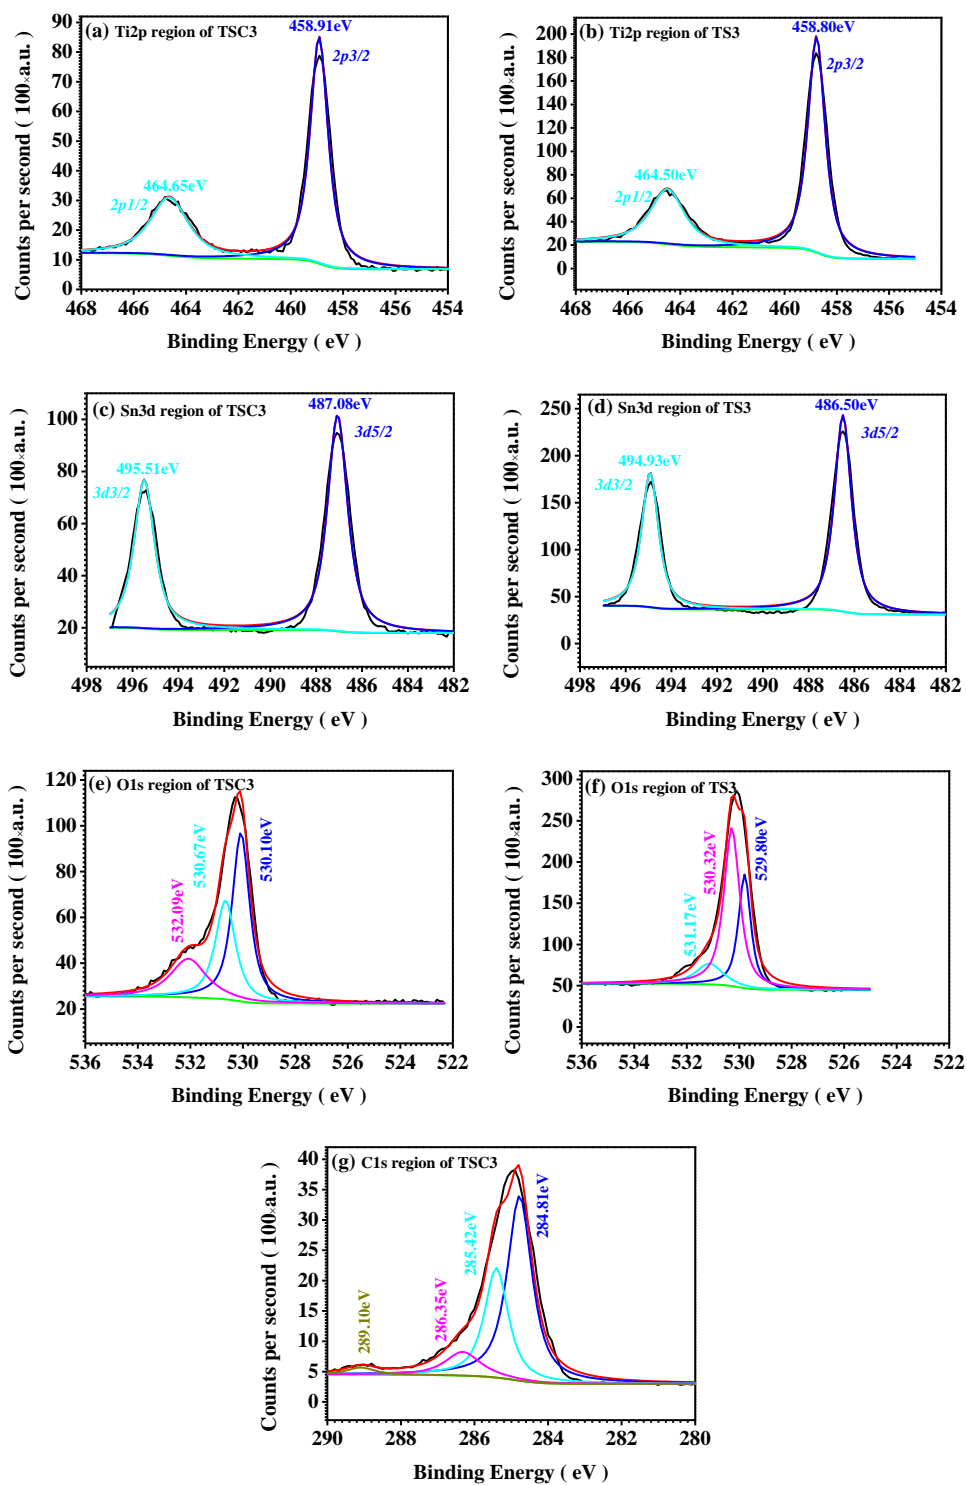

Fig. S5

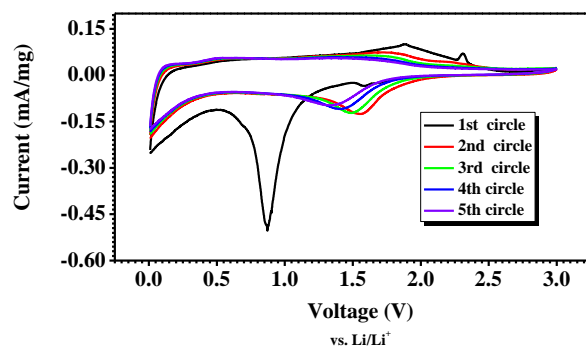

**Fig. S6**



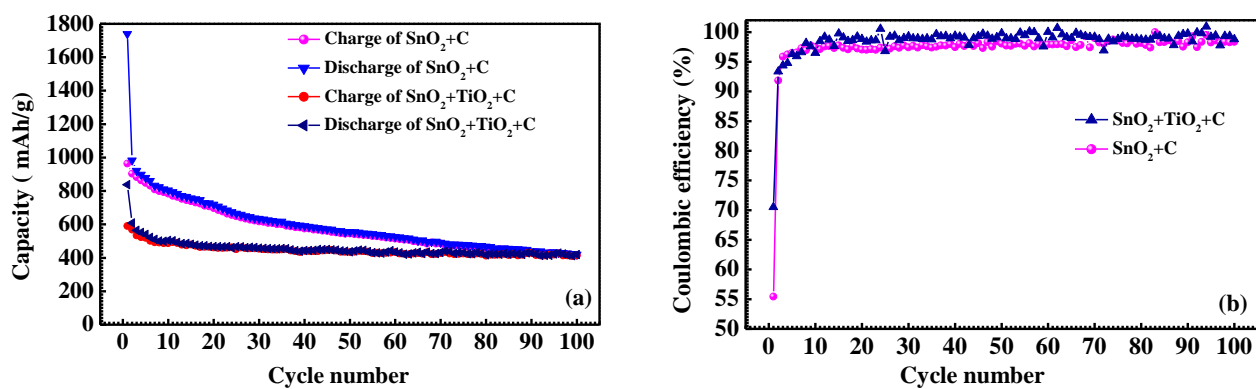

Fig. S7

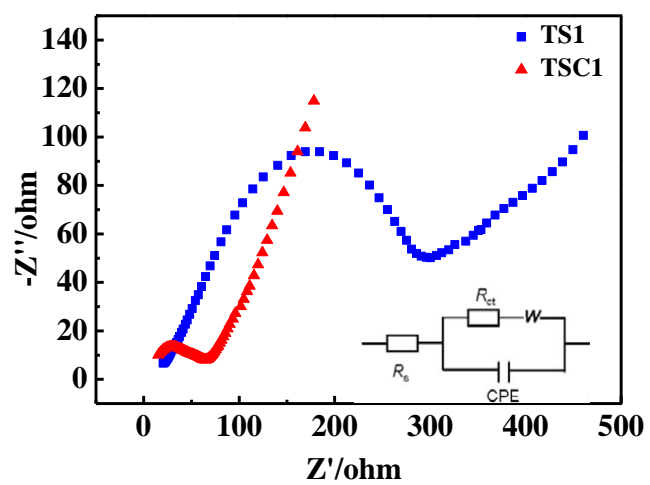

Fig. S8

**Table S1**

| Electrode                            | $R_s$ ( $\Omega$ ) | CPE ( $\mu\text{F}$ ) | $R_{ct}$ ( $\Omega$ ) |
|--------------------------------------|--------------------|-----------------------|-----------------------|
| $\text{SnO}_2+\text{TiO}_2$          | 44.53              | 7.505                 | 243.1                 |
| $\text{SnO}_2+\text{TiO}_2@\text{C}$ | 24.29              | 0.884                 | 38.39                 |

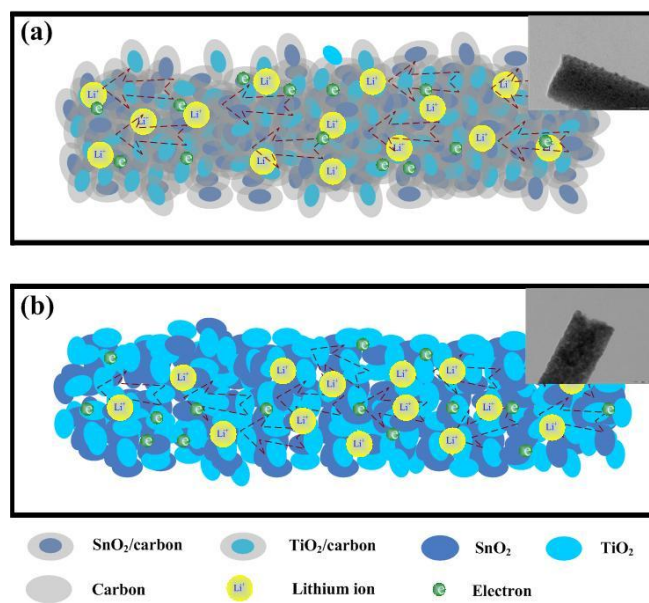

**Fig.S9**
